# Supplementary material for: Predictive skill of Atmospheric Rivers in western Iberian Peninsula
Source: Copernicus journal article supplement (doi:10.5194/nhess-2019-317), 2019-10-02
Supplement: Supplementary file 1 [file nhess-2019-317-supplement.pdf]

### Supplementary Material

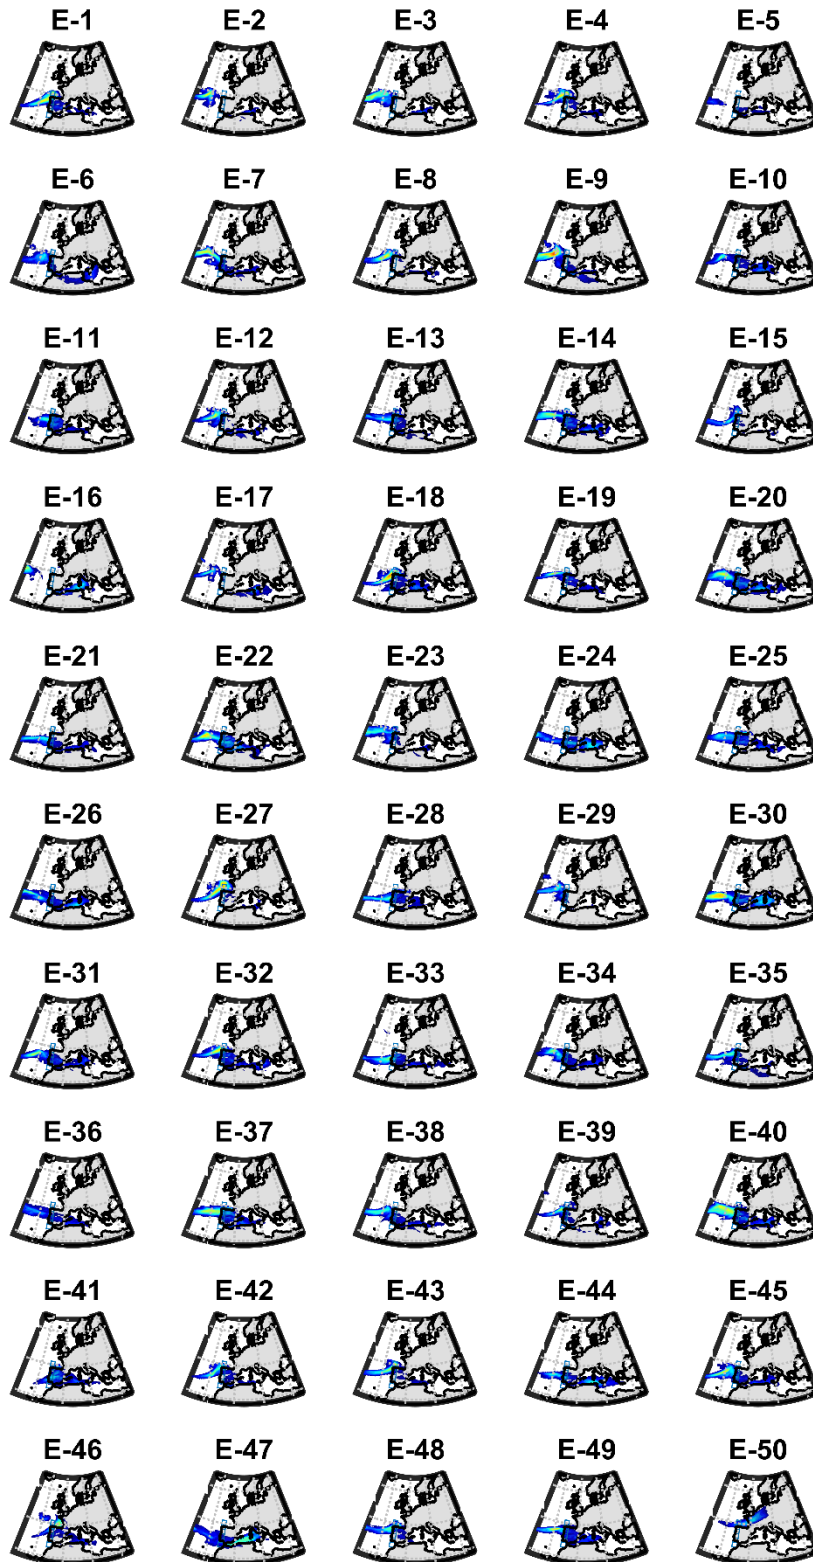

**Figure S1.** Ensemble forecast of the IVT in an event affecting Western Iberia on January 4 2016 for lead time -5 days.

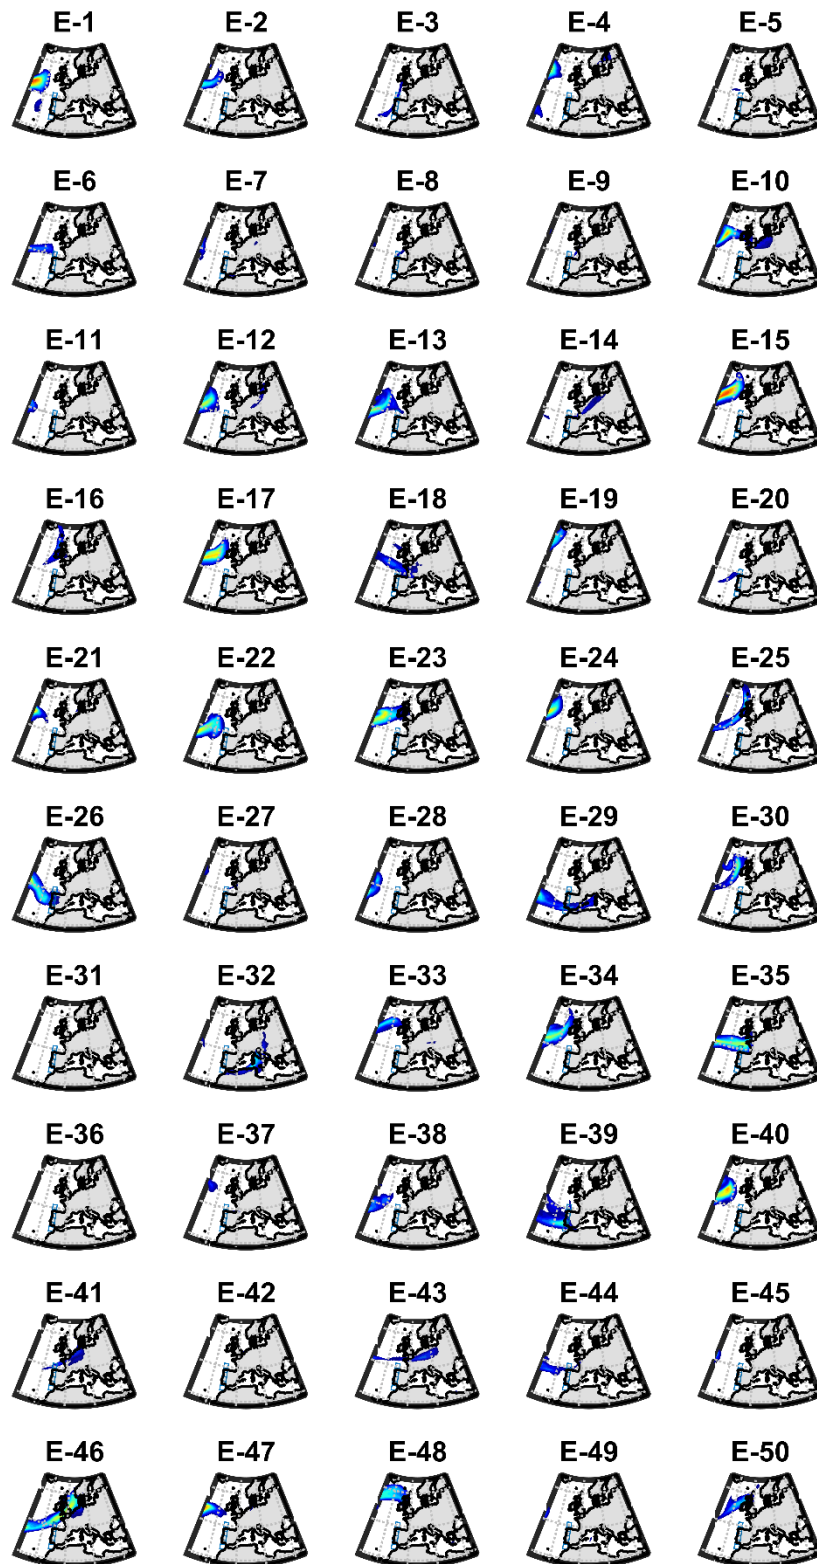

**Figure S2.** Ensemble forecast of the IVT in an event affecting Western Iberia on January 4 2016 for lead time -12 days.

$$\mathbf{POD = HITS / (HITS+MISSES)}$$

$$\mathbf{FAR = FALSE / (HITS+FALSE)}$$

$$\mathbf{SR = HITS / (HITS+FALSE)}$$

$$\mathbf{BIAS = (HITS+FALSE) / (HITS+MISSES)}$$
